# Supplementary material for: Bariatric Surgery Improves HDL Function Examined by ApoA1 Exchange Rate and Cholesterol Efflux Capacity in Patients with Obesity and Type 2 Diabetes
Source: MDPI journal article supplement (doi:10.3390/biom10040551), 2020-04-04
Supplement: s1 [file s1]

## Supplemental Figure S1

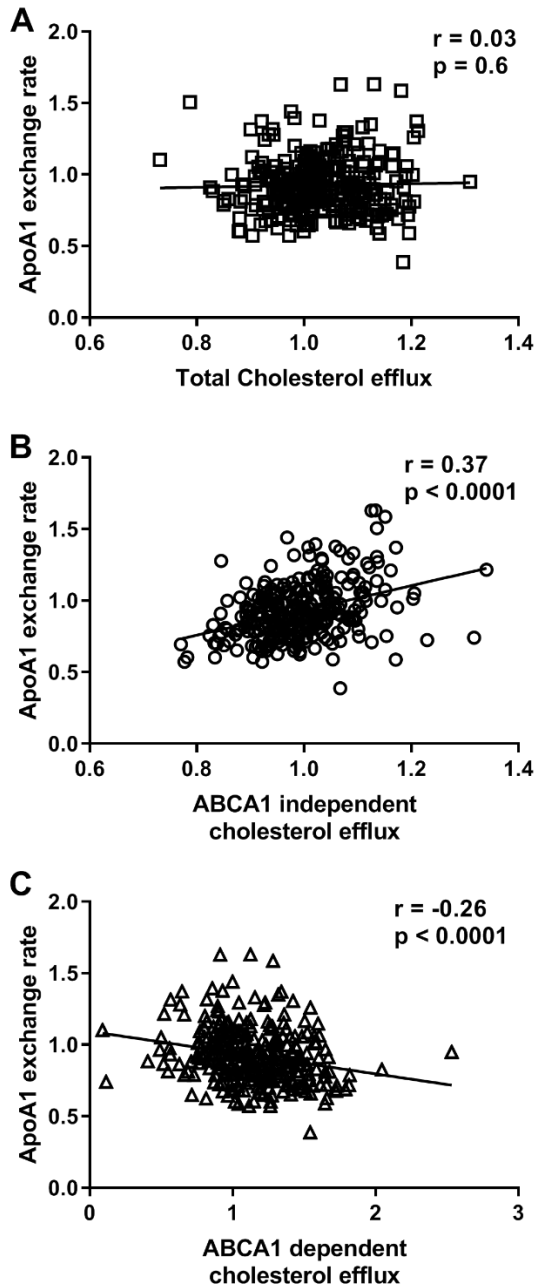

**Supplemental Figure S1. Correlation of apoA1 exchange rate to cholesterol efflux capacity.** ApoA1 exchange rate and cholesterol efflux capacity were assayed in 270 human serum samples from 90 Stampede patients. The total cholesterol efflux capacity which was measured when ABCA1 is induced (**A**), deducts ABCA1-independent efflux which was measured without ABCA1 induction (**C**), is the ABCA1 dependent cholesterol efflux capacity (**B**).

## Supplemental Figure S2

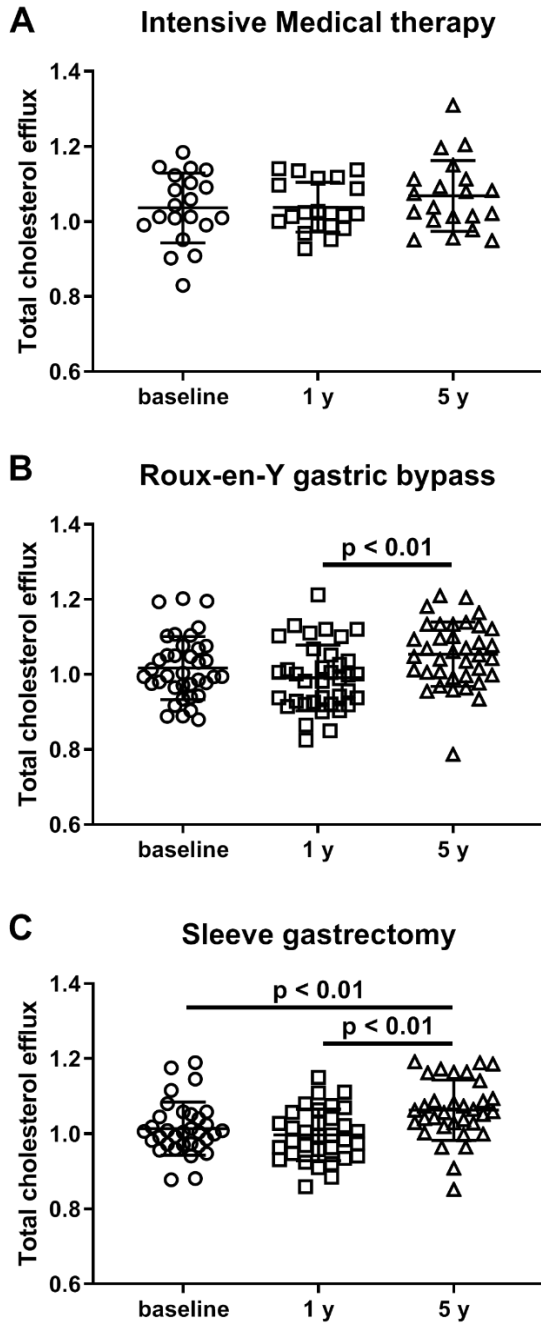

**Supplemental Figure S2. Changes of total cholesterol efflux capacity after different treatments.** The total cholesterol efflux capacity was measured in serum samples from patients who received intensive medical therapy (**A**,  $n=20$ ), Roux-en-Y gastric bypass (**B**,  $n=37$ ) or sleeve gastrectomy (**C**,  $n=33$ ) surgeries at baseline, 1 year, and 5 years after the treatments.

### Supplemental Figure S3

#### A Intensive Medical therapy

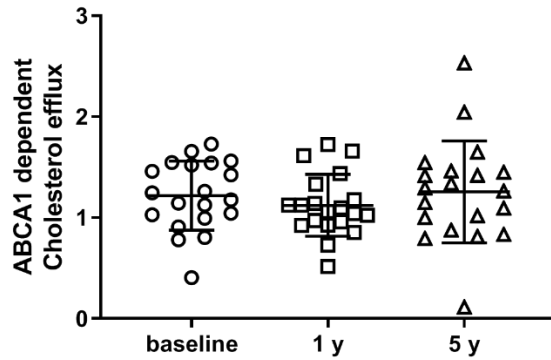

#### B Roux-en-Y gastric bypass

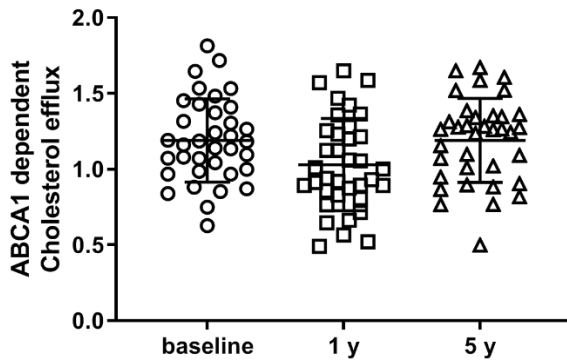

#### C Sleeve gastrectomy

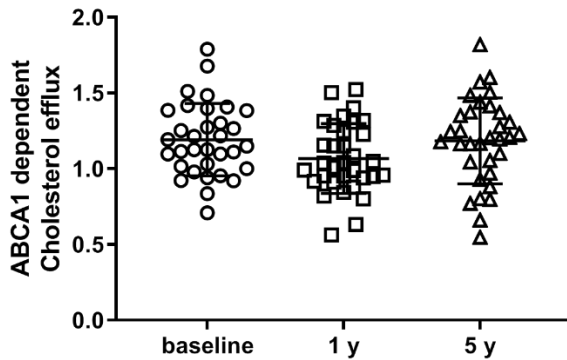

**Supplemental Figure S3. Changes of ABCA1-dependent cholesterol efflux capacity after different treatments.** ABCA1-dependent cholesterol efflux capacity was measured in serum samples from patients who received intensive medical therapy (**A**, n=20), Roux-en-Y gastric bypass (**B**, n=37) or sleeve gastrectomy (**C**, n=33) surgeries at baseline, 1 year, and 5 years after the treatments.

**Supplemental Table 1.** Multiple linear regression of changes of apoA1 exchange rate assay (AER) with changes in clinical variables at 1 year

| Term                    | Coefficient  | Std. Err.    | T-statistic  | p value      |
|-------------------------|--------------|--------------|--------------|--------------|
| Intercept               | -0.005       | 0.052        | -0.098       | 0.92         |
| Medical Therapy vs RYGB | -0.031       | 0.092        | -0.337       | 0.74         |
| Medical Therapy vs SB   | -0.023       | 0.086        | -0.262       | 0.79         |
| HbA1c                   | -0.008       | 0.013        | -0.609       | 0.54         |
| BMI                     | -0.016       | 0.008        | -1.897       | 0.061        |
| log(TG)                 | 0.027        | 0.044        | 0.622        | 0.54         |
| <b>HDL</b>              | <b>0.005</b> | <b>0.002</b> | <b>2.023</b> | <b>0.046</b> |

**Supplemental Table 2.** Multiple linear regression of changes of ABCA1-independent CEC with changes in clinical variables at 1 year

| Term                    | Coefficient  | Std. Err.    | T-statistic  | p value           |
|-------------------------|--------------|--------------|--------------|-------------------|
| Intercept               | 0.033        | 0.02         | 1.629        | 0.11              |
| Medical Therapy vs RYGB | -0.044       | 0.036        | -1.219       | 0.23              |
| Medical Therapy vs SB   | -0.048       | 0.033        | -1.441       | 0.15              |
| HbA1c                   | -0.002       | 0.005        | -0.476       | 0.64              |
| BMI                     | -0.003       | 0.003        | -1.05        | 0.3               |
| <b>log(TG)</b>          | <b>0.059</b> | <b>0.017</b> | <b>3.467</b> | <b>&lt; 0.001</b> |
| <b>HDL</b>              | <b>0.002</b> | <b>0.001</b> | <b>2.543</b> | <b>0.013</b>      |

**Supplemental Table 3.** Multiple linear regression of changes of apoA1 exchange rate assay (AER) with changes in clinical variables at 5 years

| Term                    | Coefficient   | Std. Err.    | T-statistic   | p value      |
|-------------------------|---------------|--------------|---------------|--------------|
| Intercept               | 0.06          | 0.044        | 1.363         | 0.18         |
| Medical Therapy vs RYGB | -0.079        | 0.058        | -1.372        | 0.17         |
| Medical Therapy vs SB   | -0.025        | 0.058        | -0.438        | 0.66         |
| HbA1c                   | -0.009        | 0.009        | -0.945        | 0.35         |
| <b>BMI</b>              | <b>-0.012</b> | <b>0.006</b> | <b>-2.086</b> | <b>0.041</b> |
| log(TG)                 | 0.027         | 0.034        | 0.8           | 0.43         |
| <b>HDL</b>              | <b>0.004</b>  | <b>0.002</b> | <b>2.809</b>  | <b>0.006</b> |

**Supplemental Table 4.** Multiple linear regression of changes of ABCA1-independent CEC with changes in clinical variables at 5 years

| Term                    | Coefficient  | Std. Err.    | T-statistic  | p value      |
|-------------------------|--------------|--------------|--------------|--------------|
| <b>Intercept</b>        | <b>0.054</b> | <b>0.027</b> | <b>2.046</b> | <b>0.045</b> |
| Medical Therapy vs RYGB | -0.059       | 0.035        | -1.706       | 0.093        |
| Medical Therapy vs SB   | -0.055       | 0.035        | -1.587       | 0.12         |
| HbA1c                   | -0.007       | 0.005        | -1.28        | 0.2          |
| BMI                     | -0.004       | 0.003        | -1.067       | 0.29         |
| <b>log(TG)</b>          | <b>0.049</b> | <b>0.021</b> | <b>2.352</b> | <b>0.022</b> |
| <b>HDL</b>              | <b>0.003</b> | <b>0.001</b> | <b>3.398</b> | <b>0.001</b> |
